# Supplementary material
Source: Springer Nature journal article supplement (https://www.springermedizin.de/resource/supplementary/12888_2012_1105_MOESM2_ESM.pdf/9479280)

(a) Women 2006

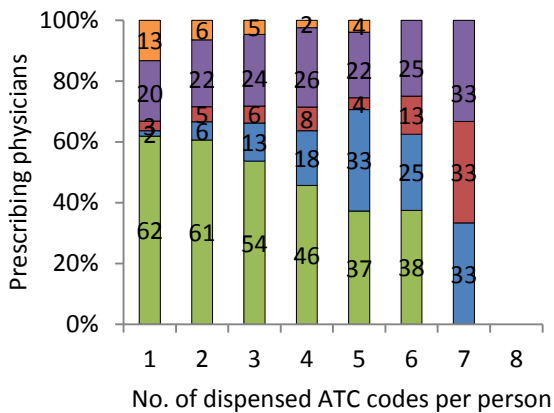

(b) Men 2006

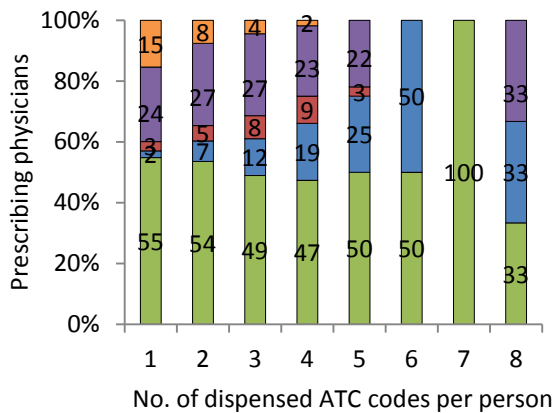

(c) Women 2007

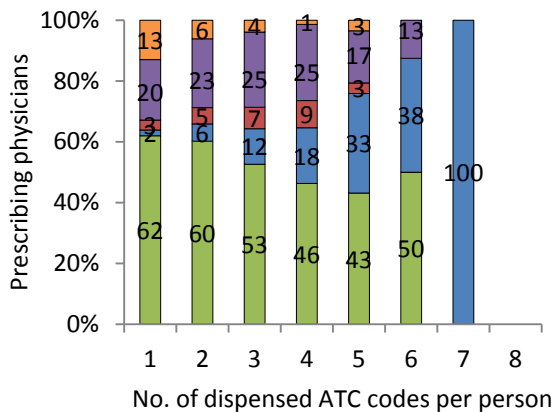

(d) Men 2007

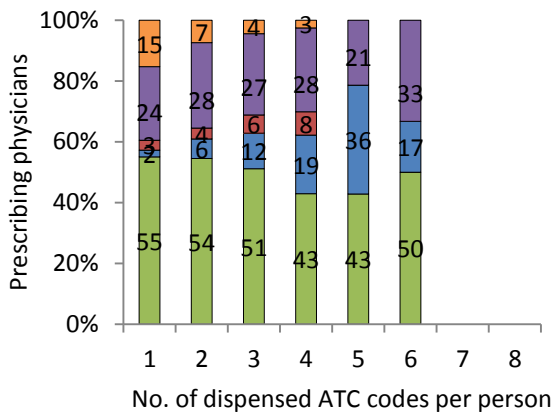

(e) Women 2008

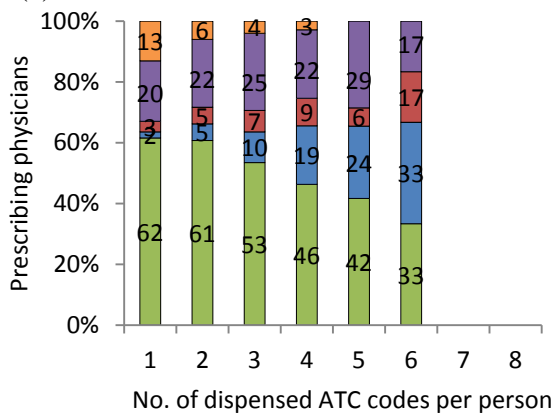

(f) Men 2008

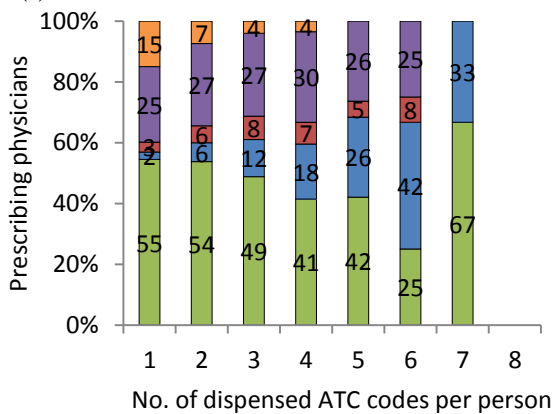

GP PSYCH GER OTH WO

Supplement: MOESM2 [file 9479280]
